# Supplementary material for: Genomic Analysis of a Serotype 5 Streptococcus pneumoniae Outbreak in British Columbia, Canada, 2005–2009
Source: Can J Infect Dis Med Microbiol. 2016 Apr 14;2016:5381871. doi: 10.1155/2016/5381871 (PMC4904568; doi:10.1155/2016/5381871)
Supplement: Supplementary file 1 — The Supplementary Material contains a summary of the PCR results for the genomic island for all the S. pneumoniae strains tested described in this paper. [file 5381871.f1.xls]

## Sheet: Sheet 1
Serotype	No.	Invasive	5' PCR	3' PCR
1	1	Invasive	-	-
3	3	Invasive	-	-
4	3	Invasive	-	-
5	146	Invasive	+	+
	2	Invasive	-	-
	2	Non-invasive	-	-
6A	1	Invasive	-	-
6B	3	Invasive	-	-
6C	2	Invasive	-	-
	1	Non-invasive	-	-
7F	2	Invasive	-	-
8	1	Invasive	-	-
9N	1	Invasive	-	-
10A	1	Invasive	-	-
10A	1	Non-invasive	-	-
11A	1	Invasive	-	-
12F	2	Invasive	-	-
13	1	Invasive	-	-
15A	1	Invasive	-	-
15B	1	Invasive	-	-
16F	1	Non-invasive	-	-
19	1	Invasive	-	-
19A	1	Invasive	-	-
20	4	Invasive	-	-
22F	2	Invasive	-	-
23A	1	Invasive	-	-
23A	3	Non-invasive	-	-
23B	1	Invasive	-	-
23F	3	Invasive	-	-
31	1	Invasive	-	-
35A	1	Non-invasive	-	-
35B	1	Invasive	-	-
35B	1	Non-invasive	-	-
35F	1	Invasive	-	-
